# Supplementary material for: Prognostic and Predictive Value of Circulating Tumor DNA in Patients with Advanced Colorectal Cancer and Chemotherapy
Source: Research Square preprint supplement (doi:10.21203/rs.3.rs-585372/v1), 2021-06-15
Supplement: Supplementary file 1 [file 8096c25204a436258c4d7560.xlsx]

## Sheet: Sheet1
Patient_id	Baseline ctDNA	Median ctDNA	Trend	Disease progression
A02465	7.19	31.65	Increased	PD_SD_SD
A06155	6.78	17.65	Increased	SD_PD_PD
A01507	32.82	37.11	Increased	PD_PD_PD
A04470	0.49	2.44	Increased	SD_PD_PD
A04948	0.34	1.62	Increased	SD_SD_PD
A07174	0.19	1.38	Increased	PD_SD
A07215	0.13	0.675	Increased	CR_SD_SD
A04256	0.51	0.92	Increased	CR_CR_SD_SD
A01366	0.33	0.59	Increased	PD_PD_SD
A02828	0.06	0.165	Negative	SD_SD_SD_SD
A02729	0.1	0.14	Negative	SD_SD_PD_PR
A05682	0.19	0.23	Negative	PD_PD_PD_PD
A02910	0.14	0.17	Negative	PD_SD_SD
A02337	0.14	0.17	Negative	SD_PR_PR
A02540	0.11	0.13	Negative	SD_SD_SD_SD
A03690	0.19	0.2	Negative	PD_PR_SD_SD
A08046	0.09	0.095	Negative	SD_SD_SD
A03742	0.16	0.15	Negative	SD_PR_SD_SD
A04438	0.07	0.055	Negative	PD_PR_SD
A03589	0.31	0.19	Decreased	PD_SD_PD
A02664	0.52	0.405	Decreased	SD_SD_SD_SD
A06824	0.4	0.215	Decreased	PD_PR_SD
A07294	0.91	0.17	Decreased	PD_PR_SD
A06826	2.13	0.29	Decreased	PD_SD_SD_SD
A03484	3.98	0.235	Decreased	PD_PD_SD_SD
A04718	4.51	0.545	Decreased	PD_PR_SD
A02012	4.99	0.31	Decreased	PD_SD_SD_SD
A02363	8.08	0.585	Decreased	PD_PR
A04061	10.82	0.15	Decreased	PD_SD_CR_CR
A05267	17.97	2.34	Decreased	PD_SD_PD
A04576	24.44	0.15	Decreased	PD_PR_PD_PD
A04673	39.72	7.225	Decreased	SD_SD_SD_SD
A05376	35.09	0.21	Decreased	SD_SD_SD_SD
A02579	55.44	0.31	Decreased	PD_PR_SD_SD
